# Supplementary material for: Dense arrangement of crown ethers in graphene: novel graphitic carbon oxides with enhanced optoelectronic properties
Source: Royal Society of Chemistry journal article supplement (doi:10.1039/d3cp03902a), 2023-12-12
Supplement: d3cp03902a1.pdf [file d3cp03902a1.pdf]

Supporting Information for

# **Dense Arrangement of Crown Ethers in Graphene: Novel Graphitic Carbon Oxides with Enhanced Optoelectronic Properties**

*HongYan Li<sup>a</sup>, Jiang Xiang<sup>a</sup>, Liang Chen<sup>b,a</sup>, Jing Xu<sup>a,\*</sup> and Wei Liu<sup>a,\*</sup>*

*<sup>a</sup> Department of Optical Engineering, College of Optical, Mechanical and Electrical  
Engineering, Zhejiang A&F University, Hangzhou, Zhejiang, 311300, P. R. China*

*<sup>b</sup> School of Physical Science and Technology, Ningbo University, Ningbo, Zhejiang,  
315211, P. R. China*

Email: weiliu@zafu.edu.cn; jingxu@zafu.edu.cn.

Keywords: Graphene; Defects; Nanopores; First-principles calculations; Optical  
adsorption.

**Table S1.** The nanopore density of CmG-n (m=3-6, n=1-6).

| System | C <sub>x</sub> O <sub>y</sub>   | primitive cell area (Å <sup>2</sup> ) | nanopore density (Å <sup>-2</sup> ) | System | C <sub>x</sub> O <sub>y</sub>   | primitive cell area (Å <sup>2</sup> ) | nanopore density (Å <sup>-2</sup> ) |
|--------|---------------------------------|---------------------------------------|-------------------------------------|--------|---------------------------------|---------------------------------------|-------------------------------------|
| C3G-1  | C <sub>4</sub> O <sub>3</sub>   | 20.22                                 | 4.95                                | C5G-1  | C <sub>28</sub> O <sub>20</sub> | 144.59                                | 2.77                                |
| C3G-2  | C <sub>12</sub> O <sub>6</sub>  | 51.24                                 | 3.90                                | C5G-2  | C <sub>14</sub> O <sub>10</sub> | 73.24                                 | 2.73                                |
| C3G-3  | C <sub>16</sub> O <sub>6</sub>  | 60.59                                 | 3.30                                | C5G-3  | C <sub>20</sub> O <sub>10</sub> | 90.82                                 | 2.20                                |
| C3G-4  | C <sub>16</sub> O <sub>6</sub>  | 60.72                                 | 3.29                                | C5G-4  | C <sub>10</sub> O <sub>5</sub>  | 45.46                                 | 2.20                                |
| C3G-5  | C <sub>8</sub> O <sub>3</sub>   | 30.93                                 | 3.23                                | C5G-5  | C <sub>10</sub> O <sub>5</sub>  | 45.58                                 | 2.19                                |
| C3G-6  | C <sub>68</sub> O <sub>3</sub>  | 189.21                                | 0.53                                | C5G-6  | C <sub>64</sub> O <sub>5</sub>  | 188.27                                | 0.53                                |
| C4G-1  | C <sub>6</sub> O <sub>4</sub>   | 28.73                                 | 3.48                                | C6G-1  | C <sub>6</sub> O <sub>6</sub>   | 39.16                                 | 2.55                                |
| C4G-2  | C <sub>8</sub> O <sub>4</sub>   | 35.64                                 | 2.81                                | C6G-2  | C <sub>12</sub> O <sub>6</sub>  | 58.70                                 | 1.70                                |
| C4G-3  | C <sub>36</sub> O <sub>16</sub> | 146.00                                | 2.74                                | C6G-3  | C <sub>12</sub> O <sub>6</sub>  | 58.93                                 | 1.70                                |
| C4G-4  | C <sub>18</sub> O <sub>8</sub>  | 75.13                                 | 2.66                                | C6G-4  | C <sub>12</sub> O <sub>6</sub>  | 59.24                                 | 1.69                                |
| C4G-5  | C <sub>18</sub> O <sub>8</sub>  | 76.22                                 | 2.62                                | C6G-5  | C <sub>14</sub> O <sub>6</sub>  | 64.70                                 | 1.55                                |
| C4G-6  | C <sub>66</sub> O <sub>4</sub>  | 188.60                                | 0.53                                | C6G-6  | C <sub>60</sub> O <sub>6</sub>  | 186.55                                | 0.54                                |

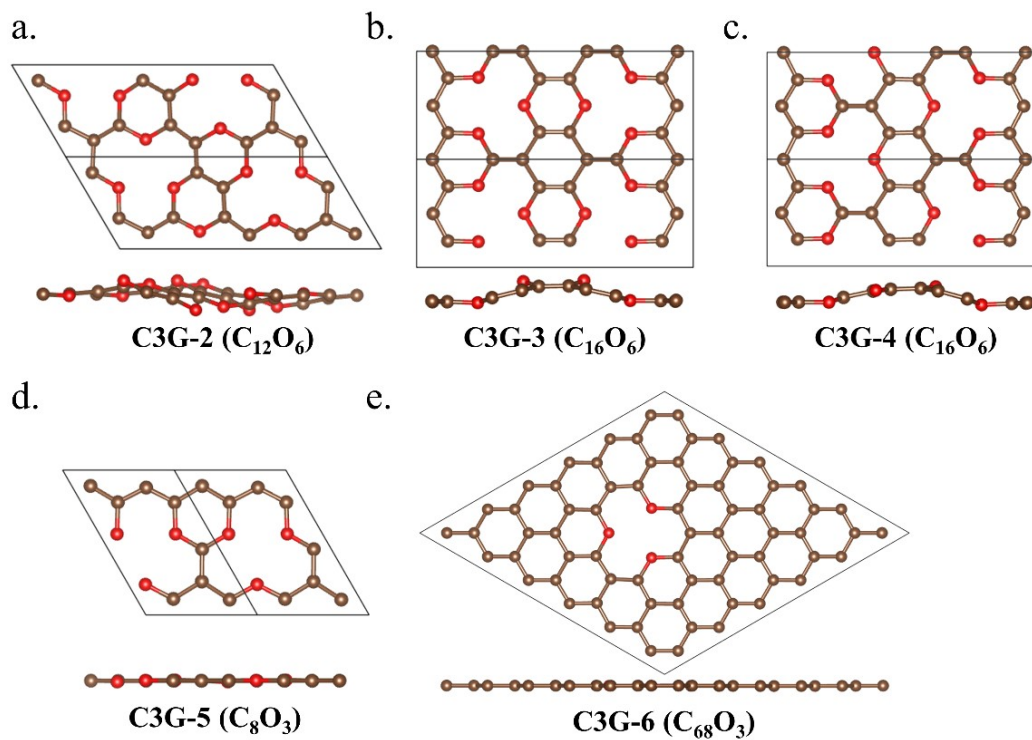

**Figure S1.** Top and side views of the optimized structures of (a) C3G-2, (b) C3G-3, (c) C3G-4, (d) C3G-5 and C3G-6.

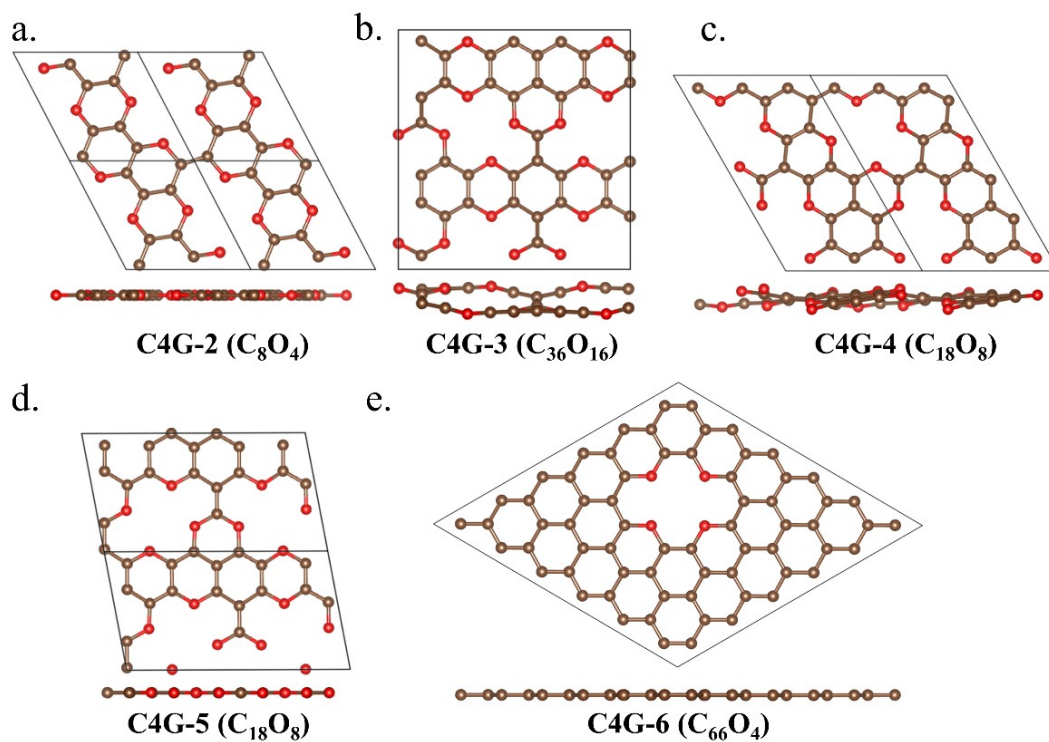

**Figure S2.** Top and side views of the optimized structures of (a) C4G-2, (b) C4G-3, (c) C4G-4, (d) C4G-5 and C4G-6.

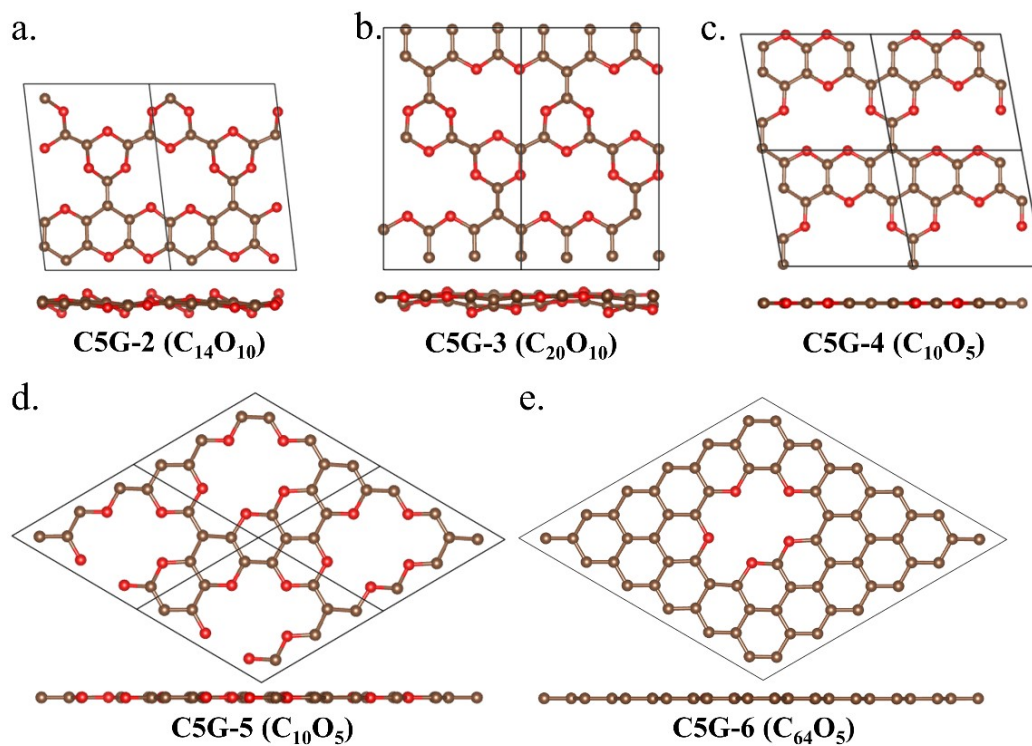

**Figure S3.** Top and side views of the optimized structures of (a) C5G-2, (b) C5G-3, (c) C5G-4, (d) C5G-5 and C5G-6.

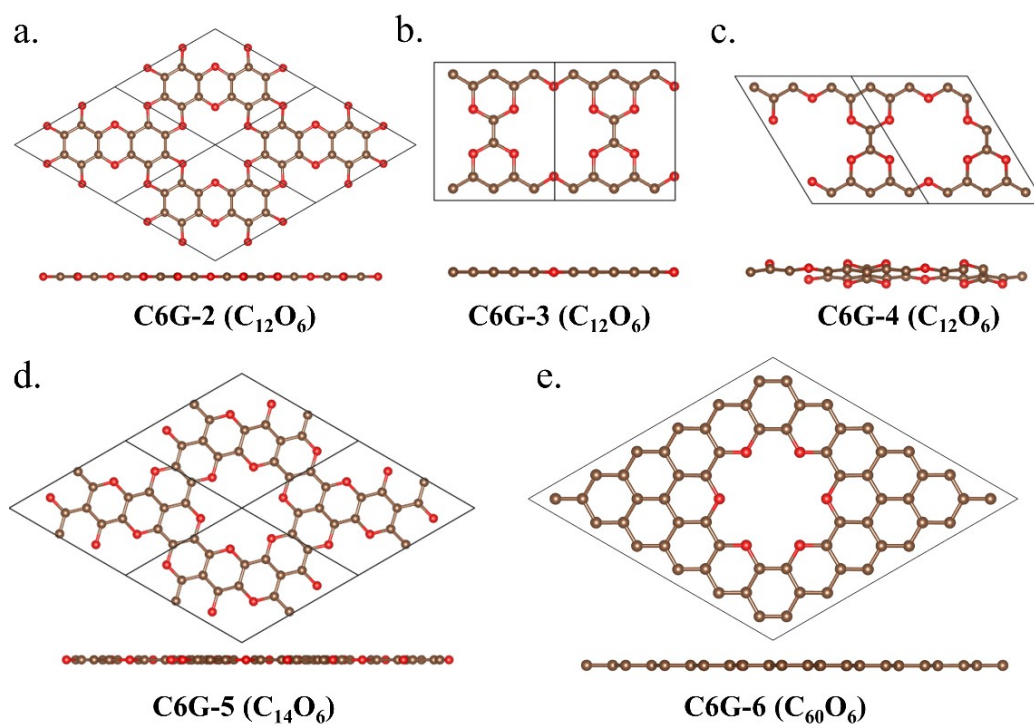

**Figure S4.** Top and side views of the optimized structures of (a) C6G-2, (b) C6G-3, (c) C6G-4, (d) C6G-5 and C6G-6.

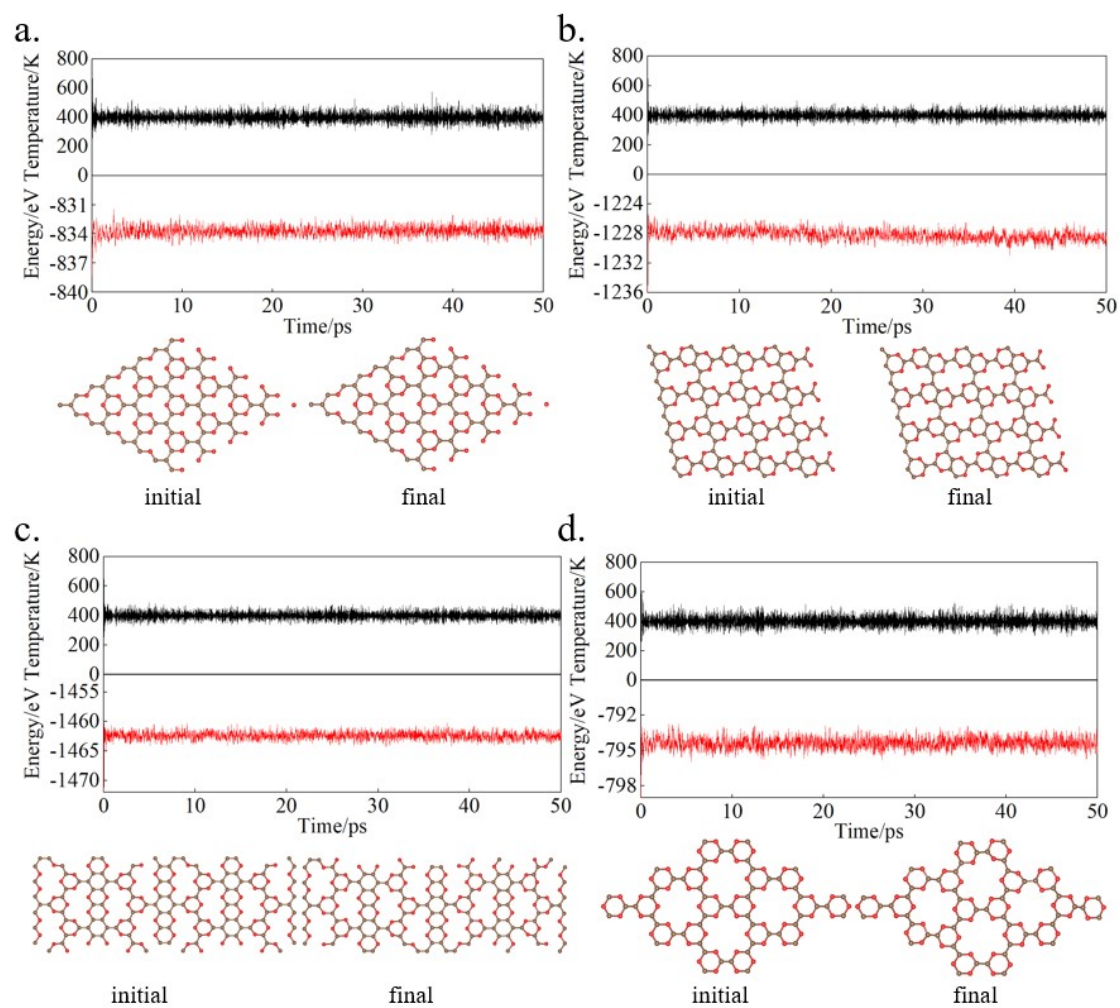

**Figure S5.** Fluctuation of temperature and energy against time for AIMD simulations at 400K: (a) C3G-1, (b) C4G-1, (c) C5G-1, (d) C6G-1. The initial and final snapshots of the simulations are also shown.

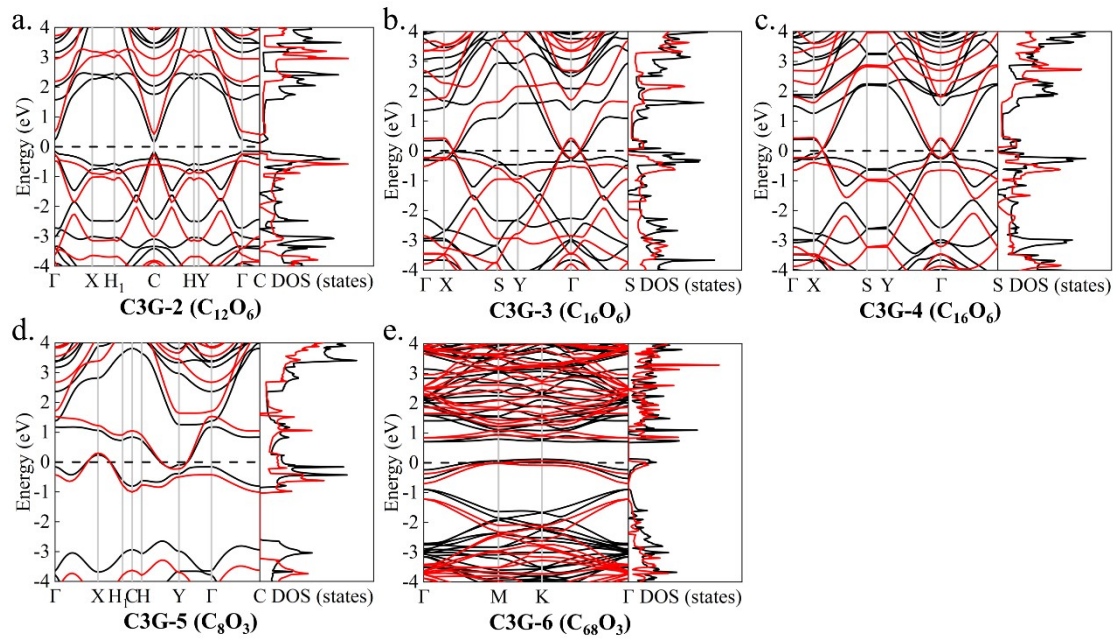

**Figure S6.** The band structures and DOS of (a) C3G-2, (b) C3G-3, (c) C3G-4, (d) C3G-5 and (e) C3G-6.



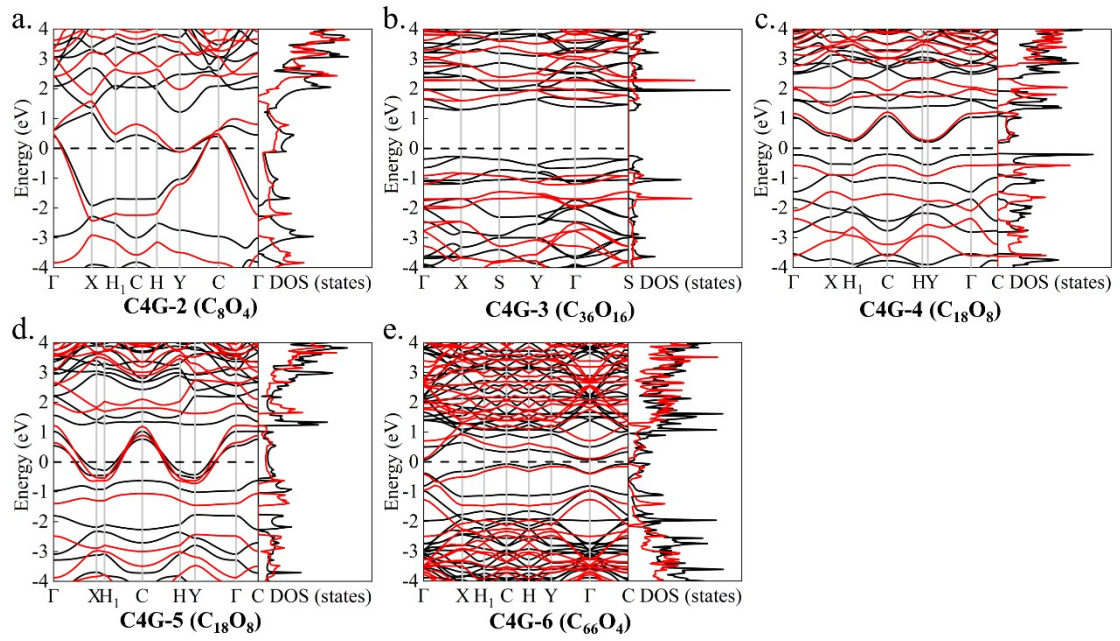

**Figure S7.** The band structures and DOS of (a) C4G-2, (b) C4G-3, (c) C4G-4, (d) C4G-5 and (e) C4G-6.

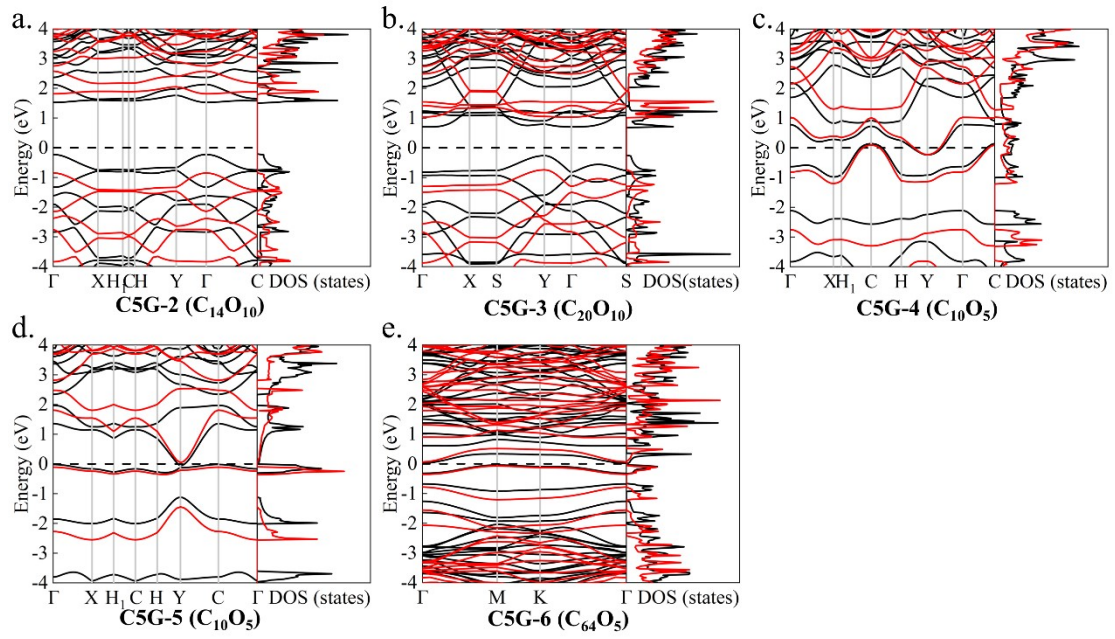

**Figure S8.** The band structures and DOS of (a) C5G-2, (b) C5G-3, (c) C5G-4, (d) C5G-5 and (e) C5G-6.

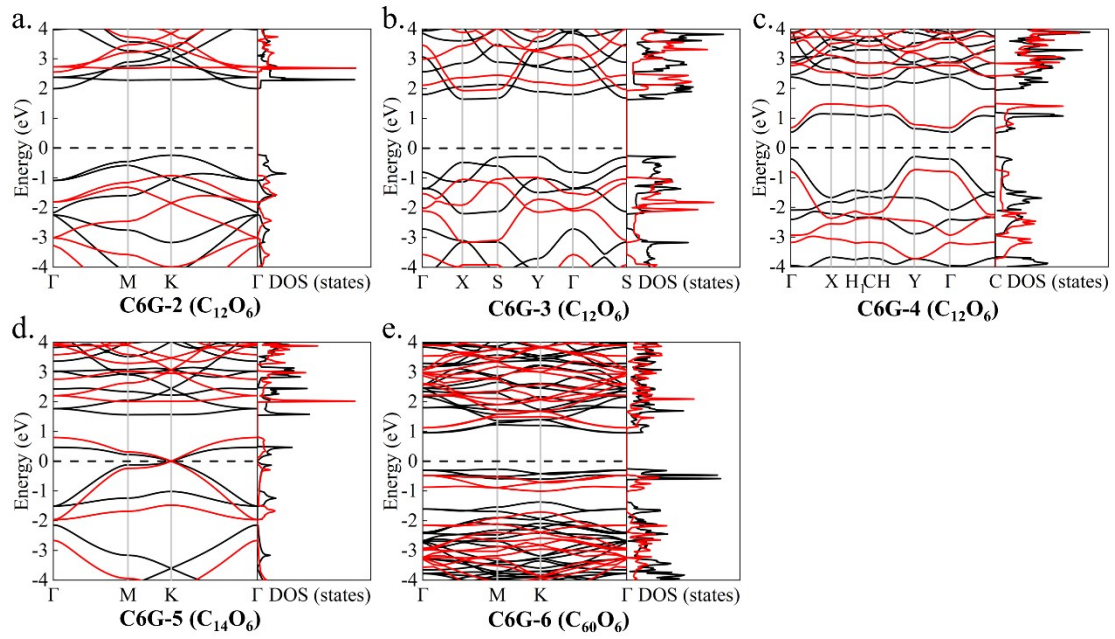

**Figure S9.** The band structures and DOS of (a) C6G-2, (b) C6G-3, (c) C6G-4, (d) C6G-5 and (e) C6G-6.

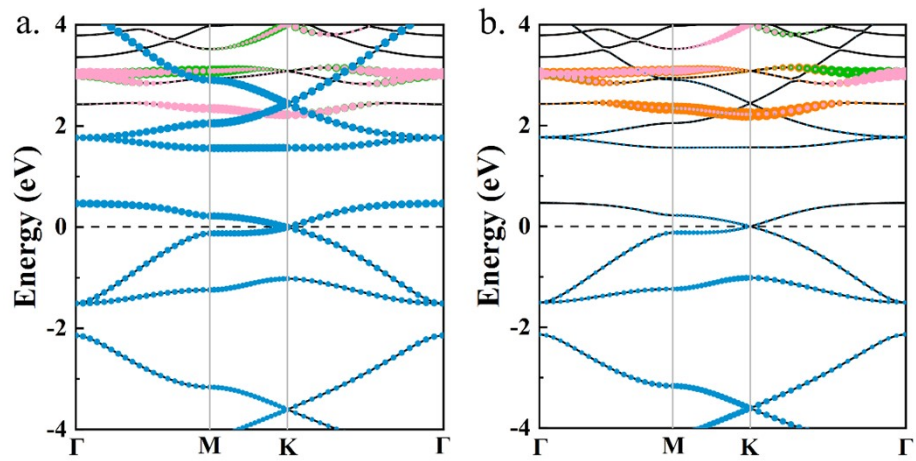

**Figure S10.** Orbital-projected band structures of (a) C atoms and (b) O atoms in C6G-5. The orange, green, pink and blue points represent the s,  $p_x$ ,  $p_y$  and  $p_z$  orbitals of C/O, respectively.

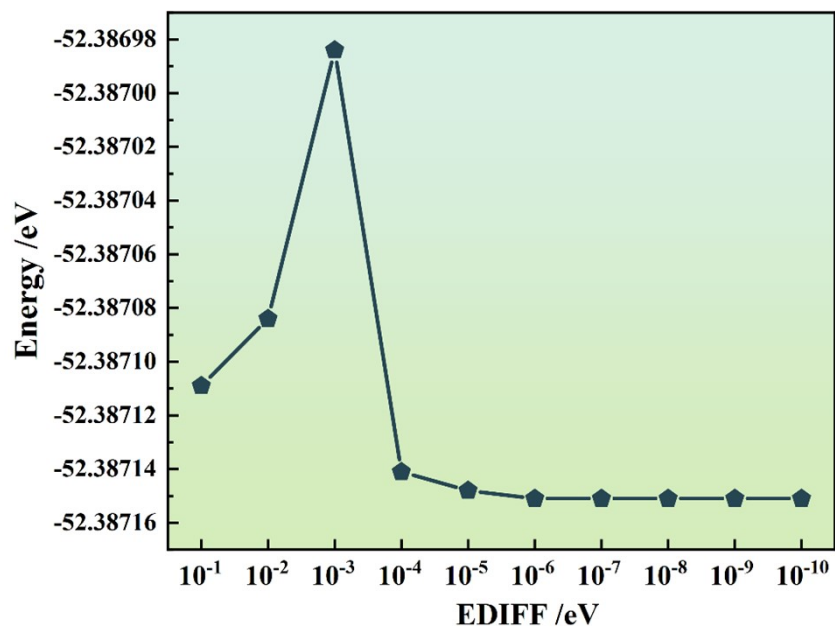

**Figure S11.** A diagram of the energy convergence standard test.
